# Supplementary material for: Beneficial Use Decision Support for Wetlands: Case Study for Mobile Bay, Alabama
Source: Atypon-hosted journal article supplement (doi:10.1061/(asce)ww.1943-5460.0000650), 2021-06-16
Supplement: supplemental_materials_ww.1943-5460.0000650_runion.pdf [file supplemental_materials_ww.1943-5460.0000650_runion.pdf]

## SUPPLEMENTAL MATERIALS

*ASCE Journal of Waterway, Port, Coastal and Ocean Engineering*

# Beneficial Use Decision Support for Wetlands: Case Study for Harbor in Mobile, Alabama

Kyle D. Runion, Brandon M. Boyd, Candice D. Piercy, and James  
T. Morris

**DOI:** 10.1061/(ASCE)WW.1943-5460.0000650

© ASCE 2021

[www.ascelibrary.org](http://www.ascelibrary.org)

**Table S1.** Inputs to the Marsh Equilibrium Model

| Parameter                                    | Value            | Unit                   |
|----------------------------------------------|------------------|------------------------|
| <b>Physical Inputs</b>                       |                  |                        |
| Run Time                                     | 100              | yr                     |
| Sea level at start                           | 22.3             | cm NAVD88              |
| 20 <sup>th</sup> century sea level rise rate | 0.3              | cm/yr                  |
| Mean tidal amplitude                         | 21               | cm                     |
| Marsh elevation, initial                     | Variable         | cm MSL                 |
| SSC (mineral)                                | Variable         | mg/L                   |
| SSC (organic)                                | Variable         | mg/L                   |
| Initial accretion rate                       | Model determined | mm/yr                  |
| <b>Biological Inputs</b>                     |                  |                        |
| Maximum growth limit                         | 75               | cm MSL                 |
| Minimum growth limit                         | -10              | cm MSL                 |
| Optimal elevation                            | 20               | cm MSL                 |
| Peak biomass                                 | 2500             | g/m <sup>2</sup>       |
| Maximum root depth                           | 30               | Cm                     |
| Organic matter decay rate                    | 75%              | %                      |
| Below-ground biomass to shoot ratio          | 0.5              | Ratio                  |
| LOI of above-marsh site                      | 20               | % dry weight           |
| Minimum mineral input                        | 1                | mg/cm <sup>2</sup> /yr |
| <b>Model Coefficients</b>                    |                  |                        |
| Maximum capture efficiency                   | 2.80             |                        |
| Refractory fraction                          | 0.1              | %                      |
| <b>Thin-Layer Placement</b>                  |                  |                        |
| Years from start                             | Variable         | yr                     |
| Repeat interval                              | Variable         | yr                     |
| Recovery time                                | 5                | yr                     |
| Add elevation                                | Variable         | cm                     |

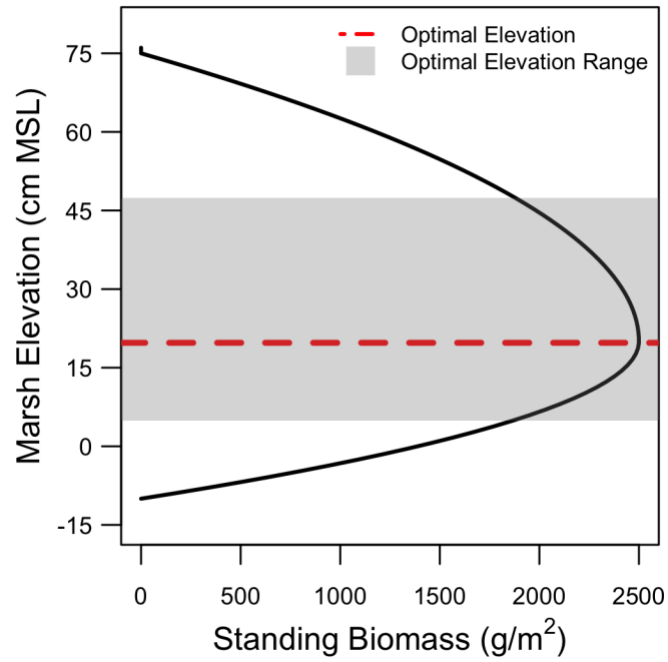

Fig. S1. Standing biomass estimates generated by the Marsh Equilibrium Model by marsh elevation. The optimal elevation, that of the highest standing biomass production, was set at 20 cm MSL. The optimal elevation range is set to include elevations where standing biomass is at 75% or greater that of the optimal elevation.

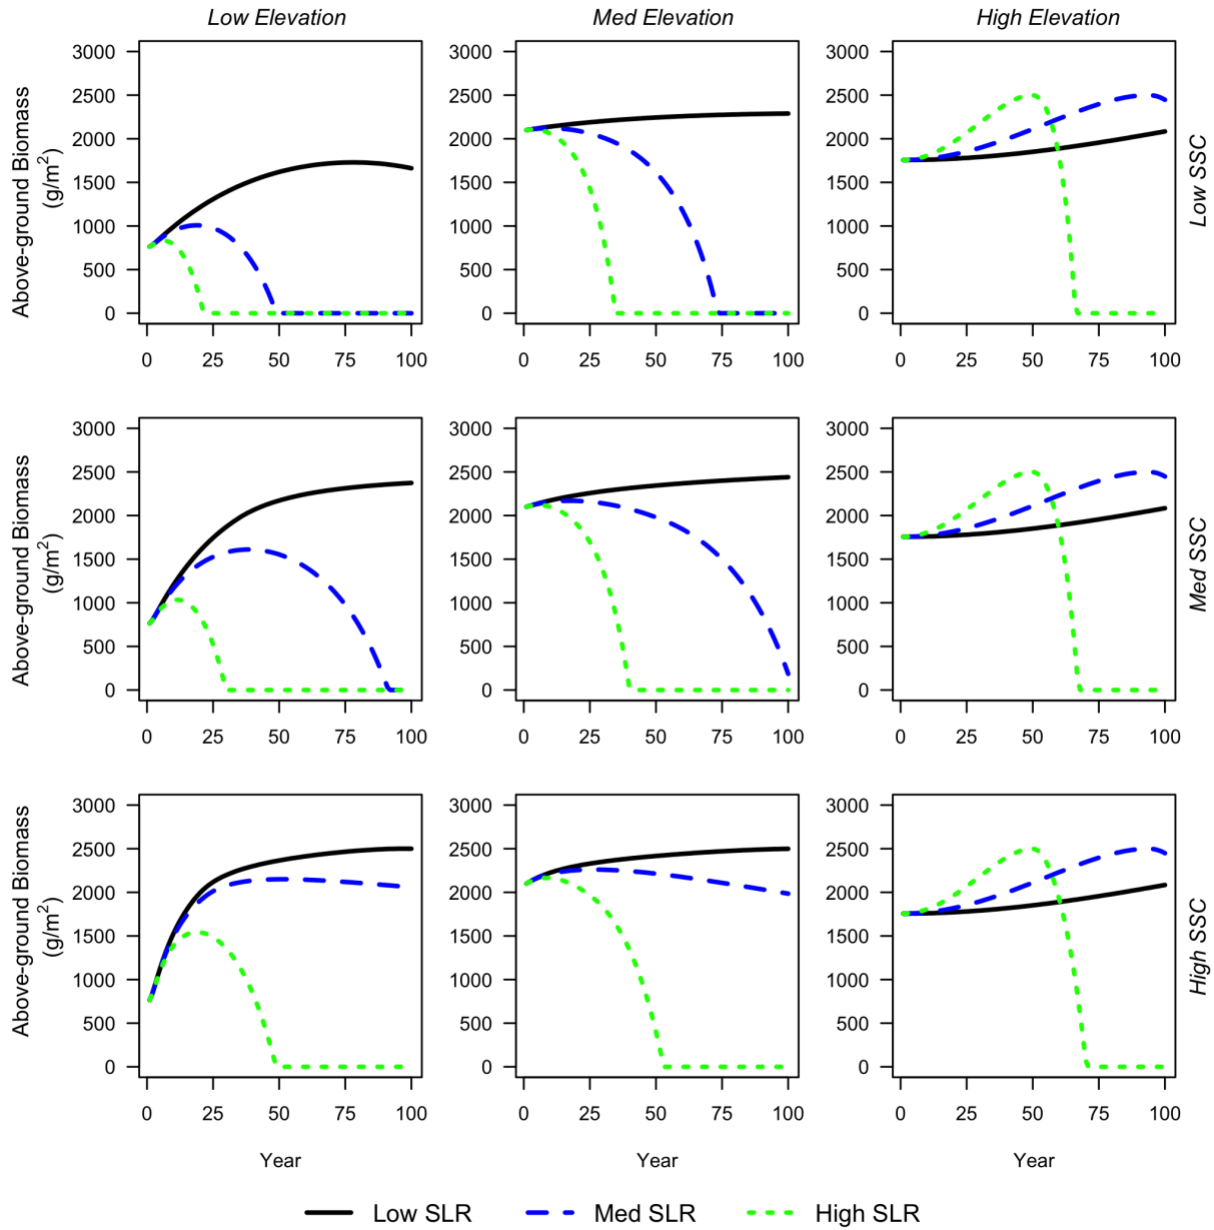

Fig. S2. Modeled above-ground biomass with no beneficial use of dredged material. Each row represents a different suspended sediment concentration (SSC) and each column represents a different initial marsh elevation. Line pattern and color represent different sea-level rise (SLR) projections used in the simulation. Scenarios are defined in Table 1.

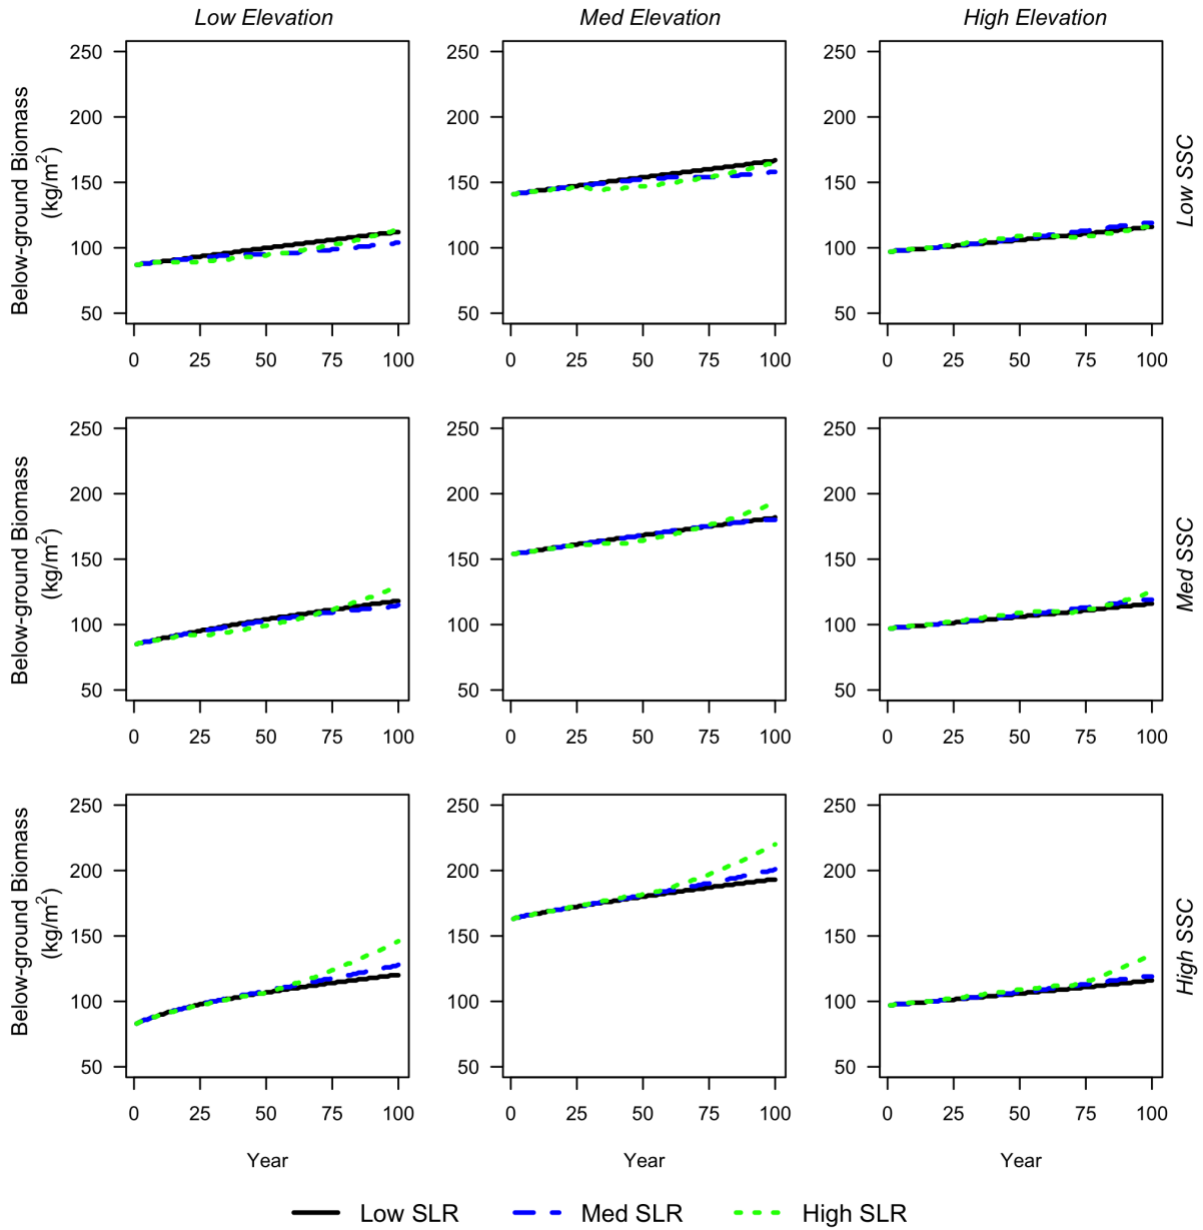

Fig. S3. Modeled below-ground biomass with no beneficial use of dredged material. Each row represents a different suspended sediment concentration (SSC) and each column represents a different initial marsh elevation. Line pattern and color represent different sea-level rise (SLR) projections used in the simulation. Scenarios are defined in Table 1.
